# Supplementary material for: The interaction of MYC with the trithorax protein ASH2L promotes gene transcription by regulating H3K27 modification
Source: PubMed Central journal article supplement (PMC4066752; doi:10.1093/nar/gku312), 2014-04-29

## SUPPLEMENTARY INFORMATION

### **The interaction of MYC with the trithorax protein ASH2L promotes gene transcription by regulating H3K27 modification**

Andrea Ullius<sup>1</sup>, Juliane Lüscher-Firzlaff<sup>1</sup>, Ivan G. Costa<sup>2</sup>, Gesa Walsemann<sup>1,4</sup>, Alexandra H. Forst<sup>1,4</sup>, Eduardo G. Gusmao<sup>2</sup>, Karsten Kapelle<sup>1,4</sup>, Henning Kleine<sup>1,4</sup>, Elisabeth Kremmer<sup>3</sup>, Jörg Vervoorts<sup>1,5</sup>, Bernhard Lüscher<sup>1,5,6</sup>

<sup>1</sup>Institute of Biochemistry and Molecular Biology, <sup>2</sup>IZKF Research Group Computational Biology, Medical School, RWTH Aachen University, 52074 Aachen, Germany; <sup>3</sup>Helmholtz Zentrum München, Institut für Molekulare Immunologie, Marchioninistr. 25, 81377 München, Germany

<sup>4</sup>Present addresses: PAREXEL International GmbH, Berlin, Germany (GW); Abbvie GmbH & Ko.KG, Wiesbaden, Germany (AHF and HK); Elchrom Scientific, Cham, Switzerland (KK).

<sup>5</sup>These author contributed equally

## **SUPPLEMENTARY FIGURE LEGENDS**

### **Supplementary Figure S1**

ASH2L-specific antibodies.

(A) HA-tagged ASH2L was expressed in COS7 cells. ASH2L proteins were immunoprecipitated using the polyclonal rabbit serum 548 (i) or HA-specific antibodies. Pre-immune serum (pi) and the MAD1-specific mAb 5F4 were used as controls. Total lysates of cells transfected with the HA-ASH2L expression plasmid (input) or with empty vector (input control) were loaded. The Western blot (WB) was probed with an antibody specific for the HA-tag (3F10).

(B) ASH2L was immunoprecipitated from lysates of Jurkat T cells using serum 548 (as in panel A), and mAbs 4B5 and 4C5. For control the lysates were incubated with Protein-G agarose. Input shows total cell lysate. The Western blot was developed using the ASH2L-specific polyclonal rabbit serum 549.

(C) The indicated proteins were immunoprecipitated from lysates of Jurkat T cells. The co-immunoprecipitation of ASH2L was analyzed by immunoblotting using the ASH2L-specific 548-8 polyclonal antiserum. Antibodies specific for the HA-tag were used as negative control.

(D) MYC was immunoprecipitated from HEK293 cells using IgG as control antibodies. The co-immunoprecipitation of ASH2L was analyzed by immunoblotting using the ASH2L-specific 4C5 monoclonal antibody.

### **Supplementary Figure S2**

Mapping of the MYC and ASH2L interaction domains.

(A,B) Glutathione-S-transferase (GST)-ASH2L and -MAX fusion proteins were used to detect interactions with in vitro transcribed and translated MYC wt and deletion mutants as indicated, GST alone was used as control. One-tenth of the in vitro transcribed/translated material was loaded as control (Input (1/10)).

(C) HEK293 cells were transiently transfected with plasmids expressing Flag-tagged MYC wt and deletion mutants or empty vector control. After immunoprecipitation of MYC proteins from F-buffer lysates using Flag-specific antibodies endogenous, co-immunoprecipitated ASH2L was detected by immunoblotting with the ASH2L-specific mAb 4C5 (upper panel). The expressions of the different Flag-tagged MYC mutants were detected by immunoblotting of whole cell lysates using the Flag-specific mAb M2 (lower panel).

(D) HEK293 cells were co-transfected with Flag-tagged ASH2L and different HA-tagged MYC deletion mutants or empty vector as control. After immunoprecipitation of ASH2L from F-buffer lysates using HA-specific antibodies co-immunoprecipitated MYC was detected by immunoblotting with the Flag-specific mAb M2 (upper panel). The expressions of the different HA-tagged MYC mutants and Flag-tagged ASH2L is shown by immunoblotting of whole cell lysates using the HA-specific mAb 3F10 (middle panel) and the Flag-specific mAb M2 (bottom panel), respectively.

### **Supplementary Figure S3**

(A) ASH2L, RbBP5, and WDR5 were transcribed and translated in vitro and the fraction bound to GST-MYC-263-439 and GST alone analyzed. One-tenth of the in vitro

transcribed/translated material was loaded as input control. The respective input of the GST proteins is shown by the Coomassie Blue (CB) stained gel.

(B) Binding of recombinant His<sub>6</sub>-WDR5 to GST-MYC-263-439 and GST alone were analyzed by GST-pull-down experiments and immunoblotting of WDR5, respectively. One-tenth of His<sub>6</sub>-WDR5 was loaded as input control. The respective input of GST proteins is shown by Ponceau staining.

(C) HEK293T cells were transfected with MYC and Flag-tagged MLL2 fragment (653 aa of C-terminus), WDR5, RbBP5, or ASH2L. Cells were harvested 48 hours after transfection and lysed in co-IP buffer. MYC was immunoprecipitated with MYC-specific antibodies (N262) and precipitates were analyzed by Western blotting with  $\alpha$ -Flag antibodies. Whole cell lysates were subjected to Western blot analysis using Flag- and MYC-specific (N262) antibodies. The arrow head in the upper panel indicates RbBP5.

#### **Supplementary Figure S4**

Characterization of P493-6 B cells.

P493-6 cells were treated with 0.1  $\mu$ g/ml tetracycline for 72 hours. Removal of tetracycline was achieved by washing the cells with PBS and adding fresh RPMI medium containing 10% FCS. Cells were harvested after the addition of fresh medium without tetracycline at the indicated time points. For control cells were grown in the absence of tetracycline and analyzed in parallel ( $\emptyset$ ).

(A) Expression of *MYC* mRNA was analyzed by quantitative RT-PCR and normalized to the expression of *GUS*. The relative expression of the normalized *MYC* mRNA is shown with the value set to 1 at the 0 hour time point. Whole cell lysates of P493-6 cells were prepared 0, 3, and 6 hours after tetracycline removal and MYC protein levels were measured by Western Blot analysis using MYC-specific antibodies (N262) and actin as loading control (inset).

(B) P493-6 were fixed with methanol and stained with propidium iodide. Distribution of cells in G1, S or G2/M phase was determined using flow cytometry analysis (FACS).

(C) Expression of *CCND2*, *ODC*, and *NCL* mRNA was analyzed at the different time points by quantitative RT-PCR and normalized to *GUS*. The relative expression of the normalized *CCND2*, *ODC*, and *NCL* mRNAs is shown with the values set to 1 at the 0 hour time point.

#### **Supplementary Figure S5**

(A) P493-6 B cells were treated with 0.1  $\mu$ g/ml tetracycline for 72 hours. ChIP assays were performed either directly (-MYC) or six hours after tetracycline removal (+MYC) with IgG control antibodies. Immunoprecipitated DNA was amplified by quantitative PCR (qPCR) with primers for *CCND2*, *ODC*, and *NCL* promoter regions and a control region 22 kbp upstream of the *CCND2* promoter (*ctrl*), as indicated in the scheme.

(B) HEK293T cells were transiently transfected with siRNA oligo pools targeting *ASH2L* mRNA or with a control oligo pool (Ctrl). ChIP assays were carried out with IgG control antibodies. Purified DNA was analyzed by qPCR as described in A.

(C) HEK293T cells were transiently transfected with siRNA oligo pools targeting *MYC* mRNA or with a control oligo pool (Ctrl). ChIP assays were performed with IgG control antibodies. DNA fragments were analyzed as described in A.

### **Supplementary Figure S6**

ChIP assays of HEK293T cells, transfected with single siRNA oligos (#1 in panels A, C, E, and G or #2 in panels B, D, F, and H) targeting *ASH2L* mRNA or with a control siRNA oligos (Ctrl), were performed with antibodies against ASH2L (A+B), H3K27ac (C+D), H3K27me3 (E+F), and IgG as control (G+H). Immunoprecipitated DNA was amplified by quantitative PCR (qPCR) with primers for *CCND2*, *ODC*, and *NCL* promoter regions and a control region 22 kbp upstream of the *CCND2* promoter (*ctrl*), as indicated in the scheme.

### **Supplementary Figure S7**

ChIP assays of HEK293T cells, transfected with single siRNA oligos (#1 in panels A, C, E, and G or #2 in panels B, D, F, and H) targeting *MYC* mRNA or with a control siRNA oligos (Ctrl), were performed with antibodies against MYC (A+B), H3K27ac (C+D), H3K27me3 (E+F), and IgG as control (G+H). Immunoprecipitated DNA was amplified by quantitative PCR (qPCR) with primers for *CCND2*, *ODC*, and *NCL* promoter regions and a control region 22 kbp upstream of the *CCND2* promoter (*ctrl*), as indicated in the scheme.



## SUPPLEMENTARY TABLES

**Supplementary Table S1 – Statistics on TF Chip-Seq Peaks**

|              | Poised Enhancer | Closed Chromatin | Active Gene | Active Enhancer | Poised Gene | Total Peaks |
|--------------|-----------------|------------------|-------------|-----------------|-------------|-------------|
| WDR5         | 1670            | 6170             | 6706        | 2056            | 298         | 61360       |
| MYC          | 2484            | 616              | 11298       | 10039           | 173         | 37342       |
| MYC and WDR5 | 235             | 192              | 5209        | 730             | 89          | 9894        |

**Supplementary Table S2 – Statistics of Regulatory Regions and POL II**

|                  | no POL II     | POL II     | Total |
|------------------|---------------|------------|-------|
| Poised Promoter  | 664 (94%)     | 39 (6%)    | 703   |
| Poised Enhancer  | 47164 (97%)   | 1461 (3%)  | 48625 |
| Active Promoter  | 1706 (14%)    | 8754 (86%) | 10460 |
| Active Enhancer  | 26365 (84%)   | 9865 (16%) | 36230 |
| Repressive Marks | 53214 (99.9%) | 114 (0.1%) | 53328 |

**Supplementary Table S3 – Binding Site Statistics**

| Peaks        | Motif | Prop. Sites | Prop. Sites Back. | P-value    | Sites on Peaks | Sites on Back |
|--------------|-------|-------------|-------------------|------------|----------------|---------------|
| MYC          | MYC   | 53.6        | 17.83             | $10^{-16}$ | 16968          | 6315          |
| MYC          | ASH2L | 71.53       | 35.4              | $10^{-16}$ | 18717          | 10837         |
| MYC and WDR5 | MYC   | 61          | 18.1              | $10^{-16}$ | 6693           | 2037          |
| MYC and WDR5 | ASH2L | 77.28       | 35.95             | $10^{-16}$ | 6757           | 3449          |
| WDR5         | MYC   | 45.34       | 18.61             | $10^{-16}$ | 23624          | 11042         |
| WDR5         | ASH2L | 80.56       | 35.24             | $10^{-16}$ | 35822          | 18135         |

# Figure S1 revised

## A

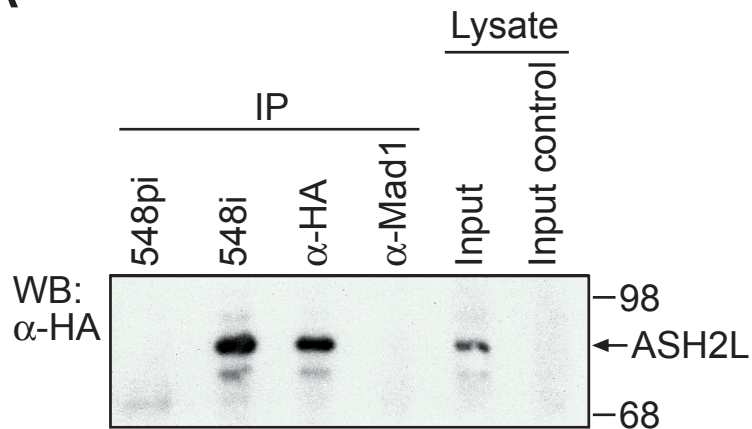

## B

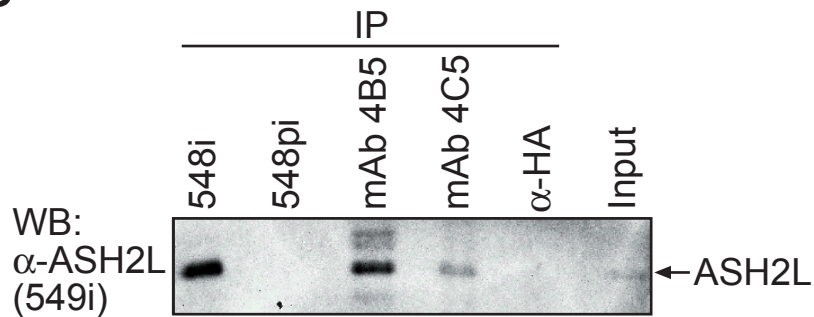

## C

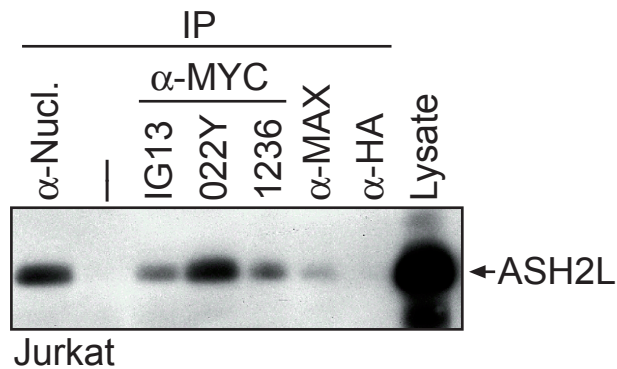

## D

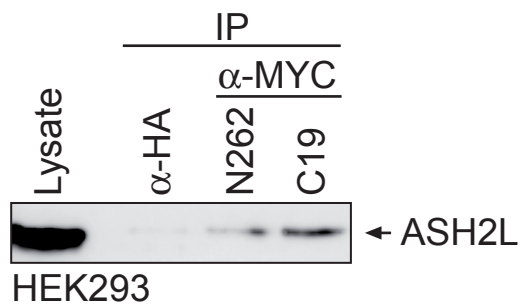

# Figure S2 revised

## A

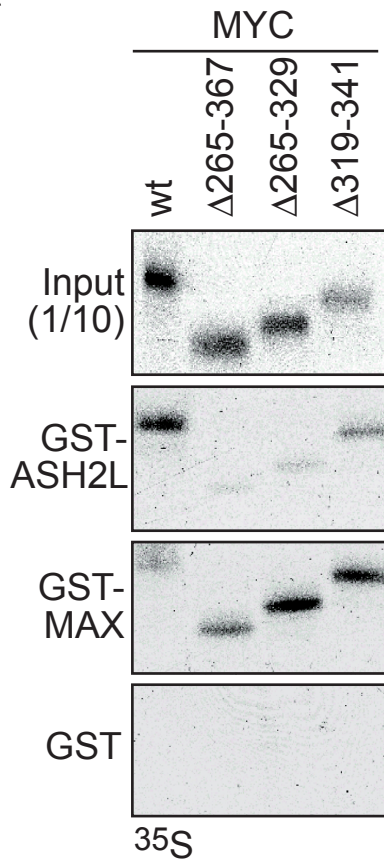

## B

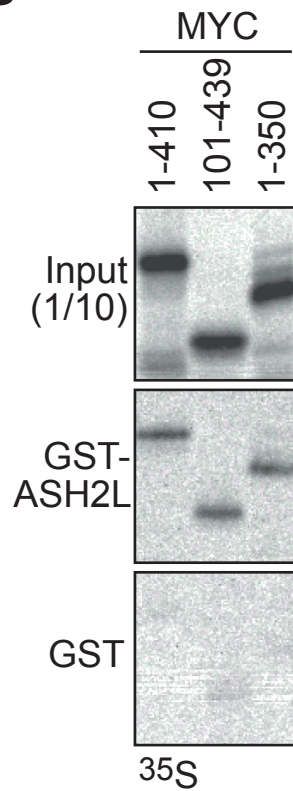

## E

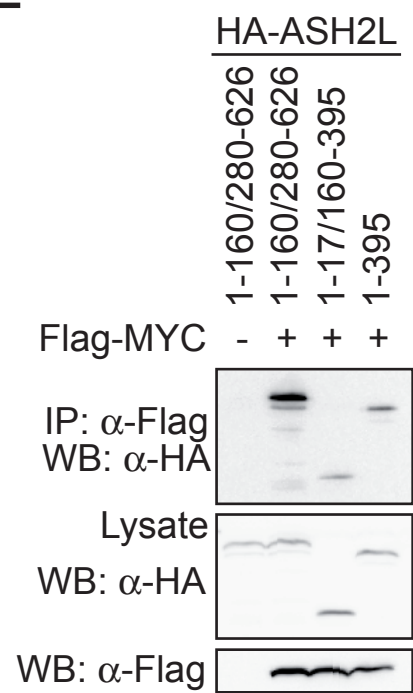

## C

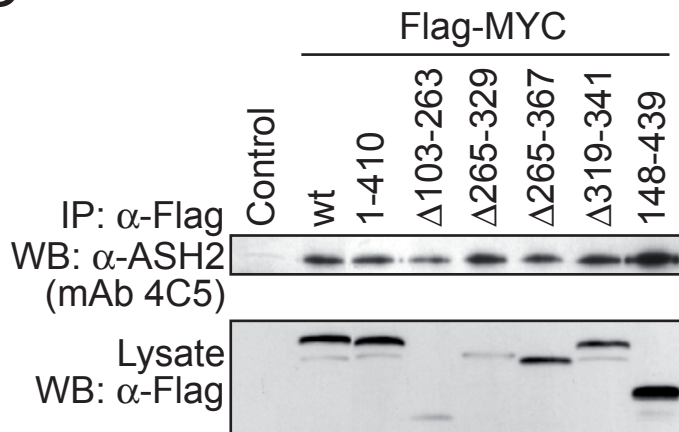

## D

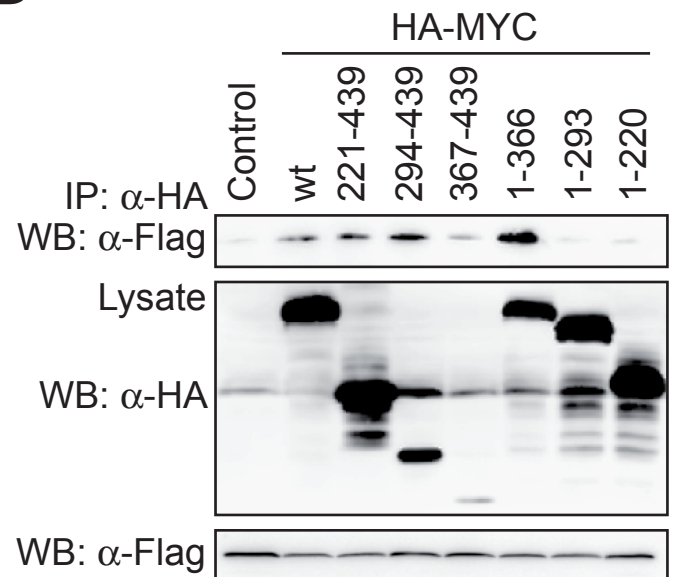

Figure S3 revised

A

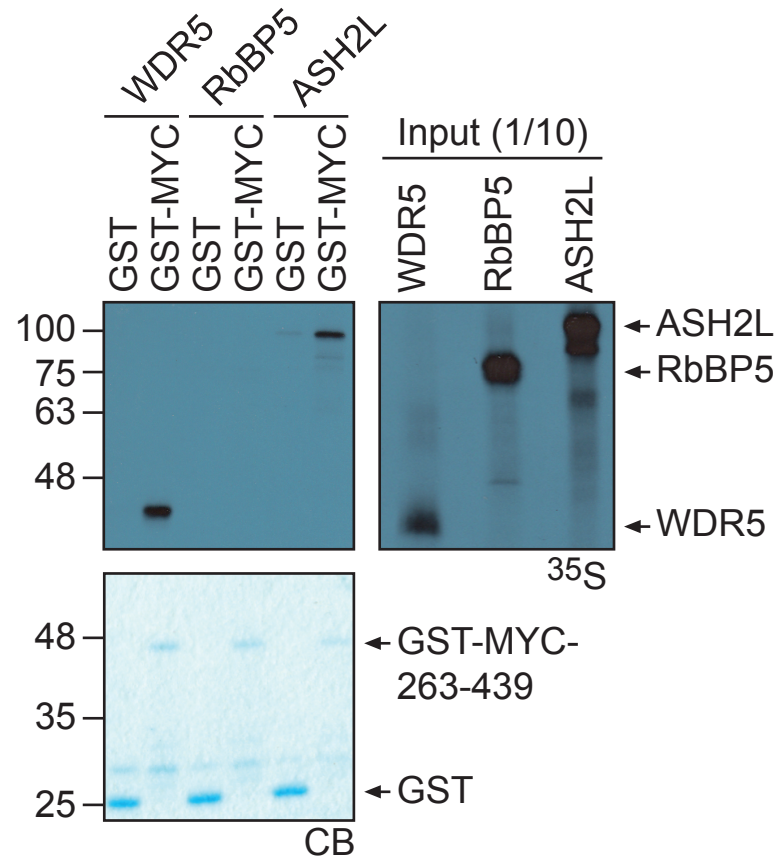

B

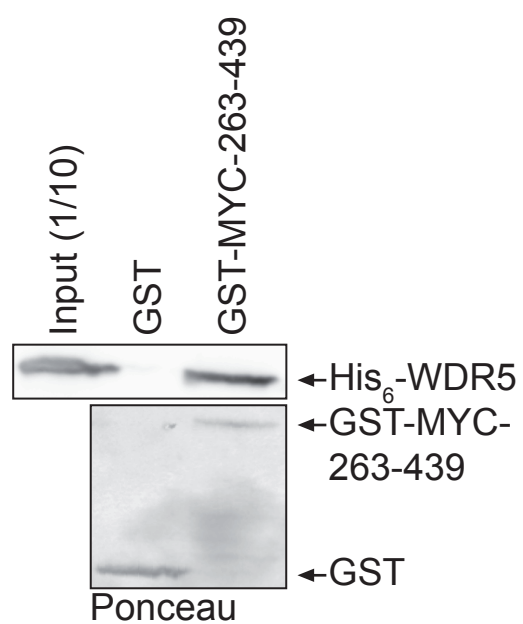

C

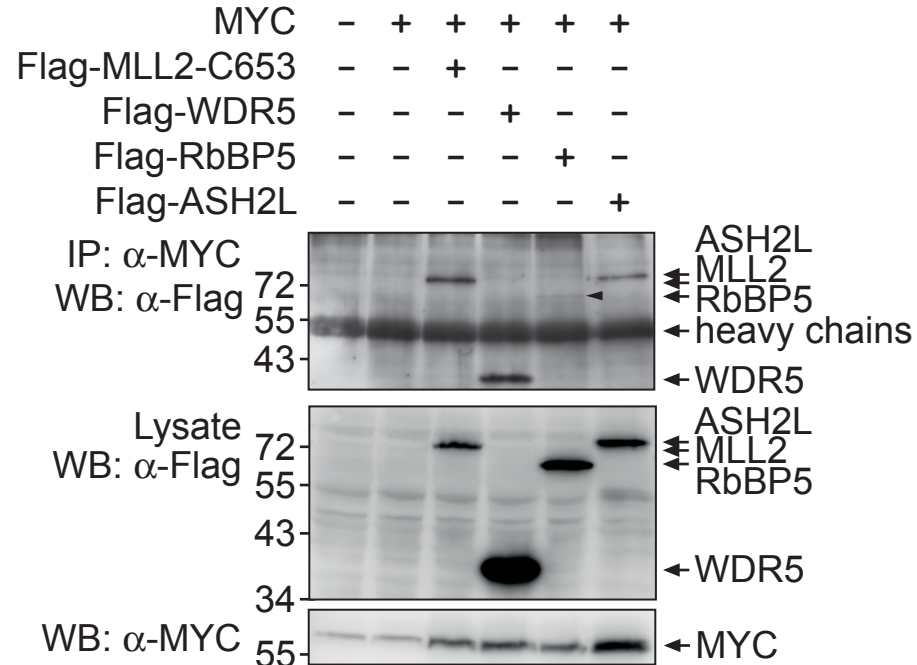

Figure S4 revised

A

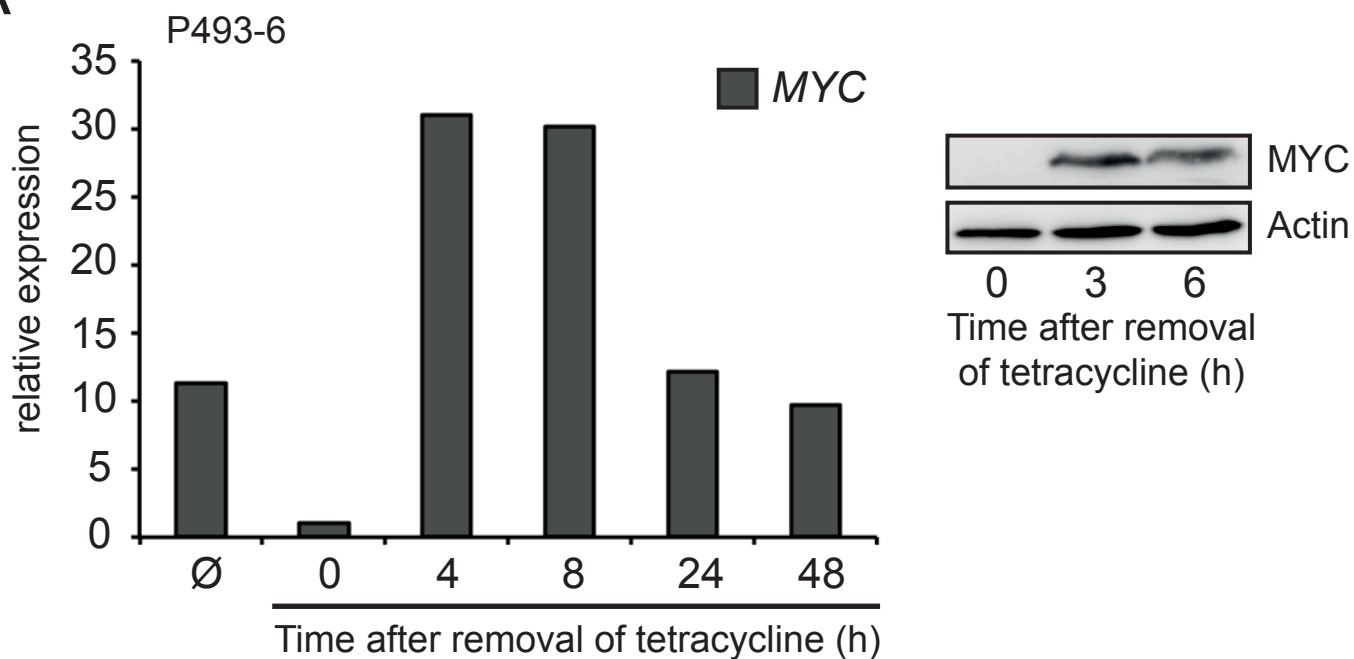

B

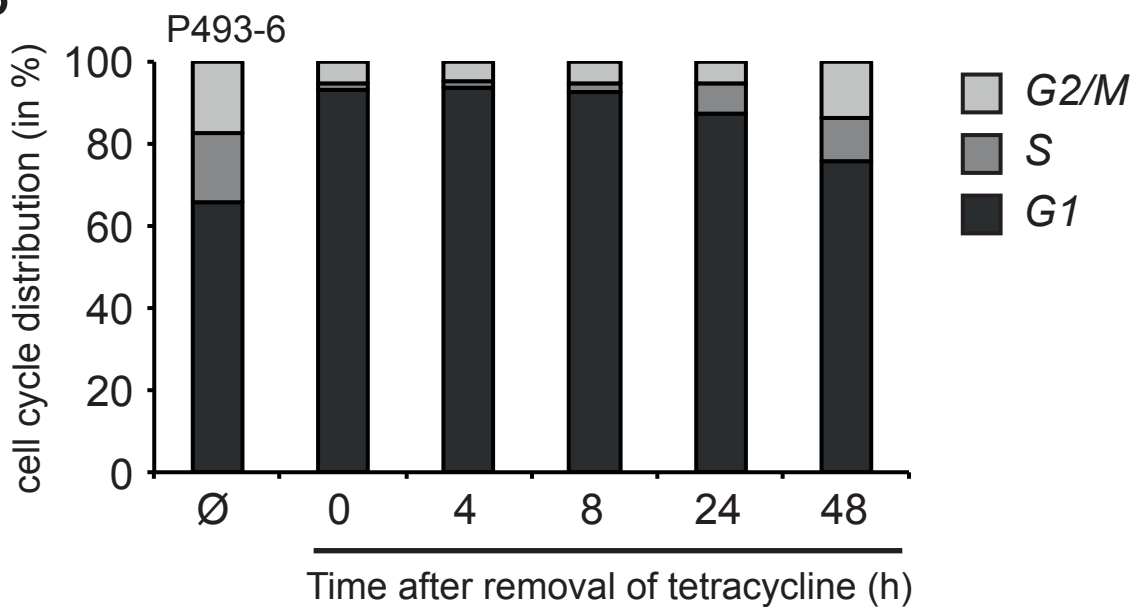

C

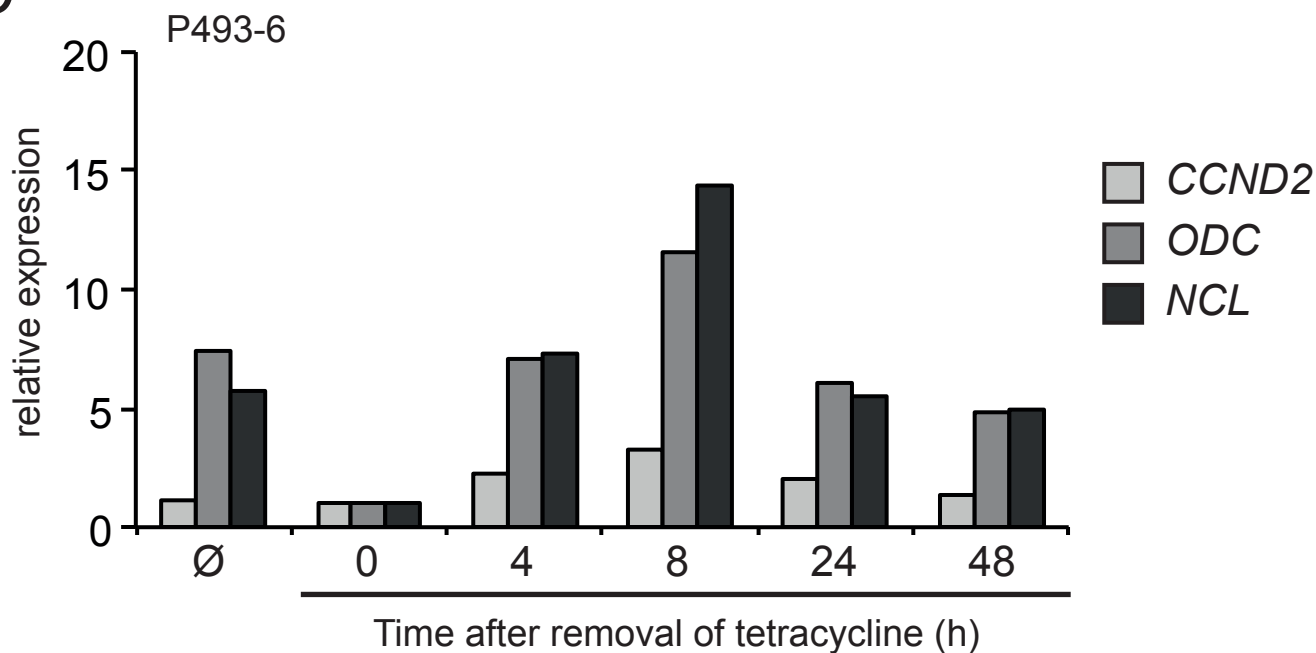

Figure S5 revised

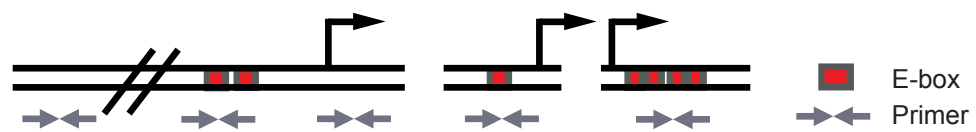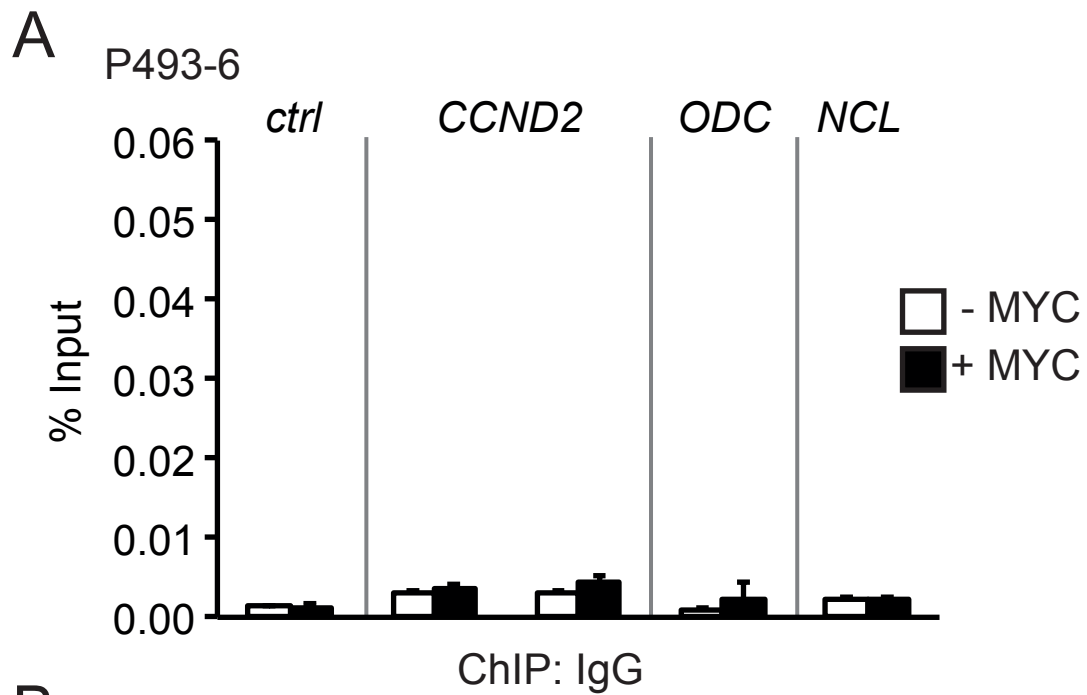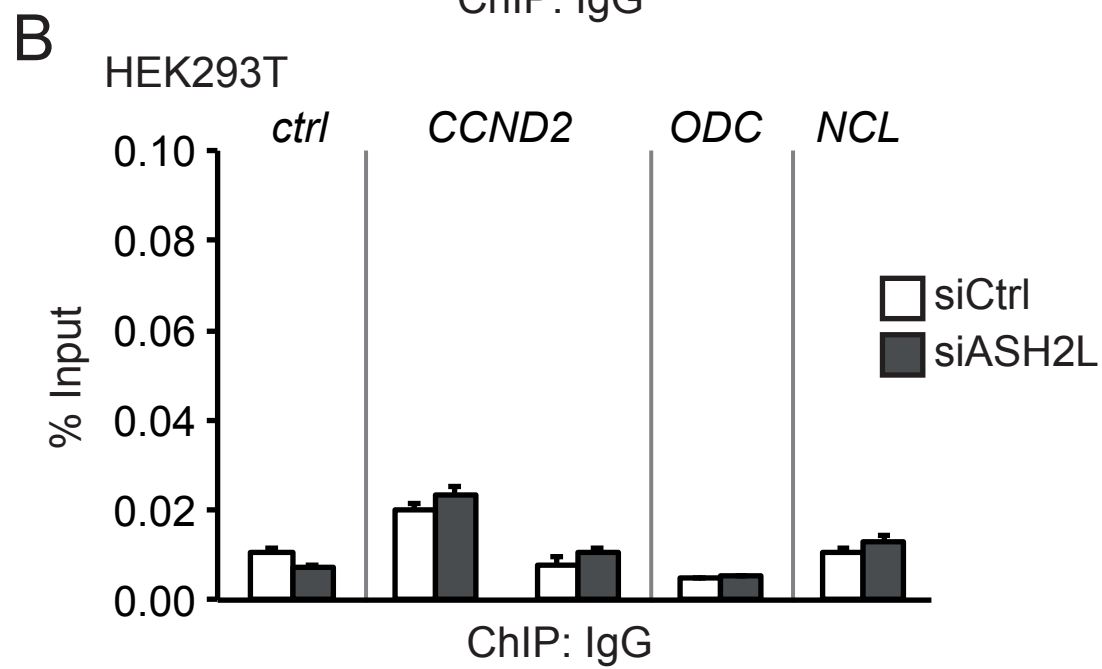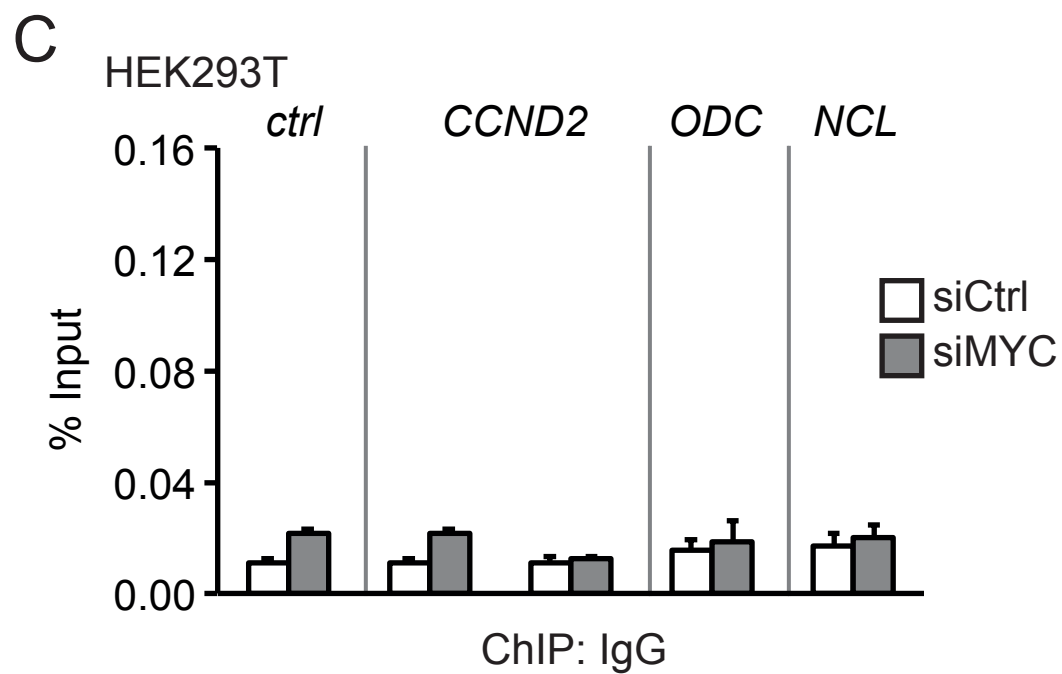

Figure S6 revised

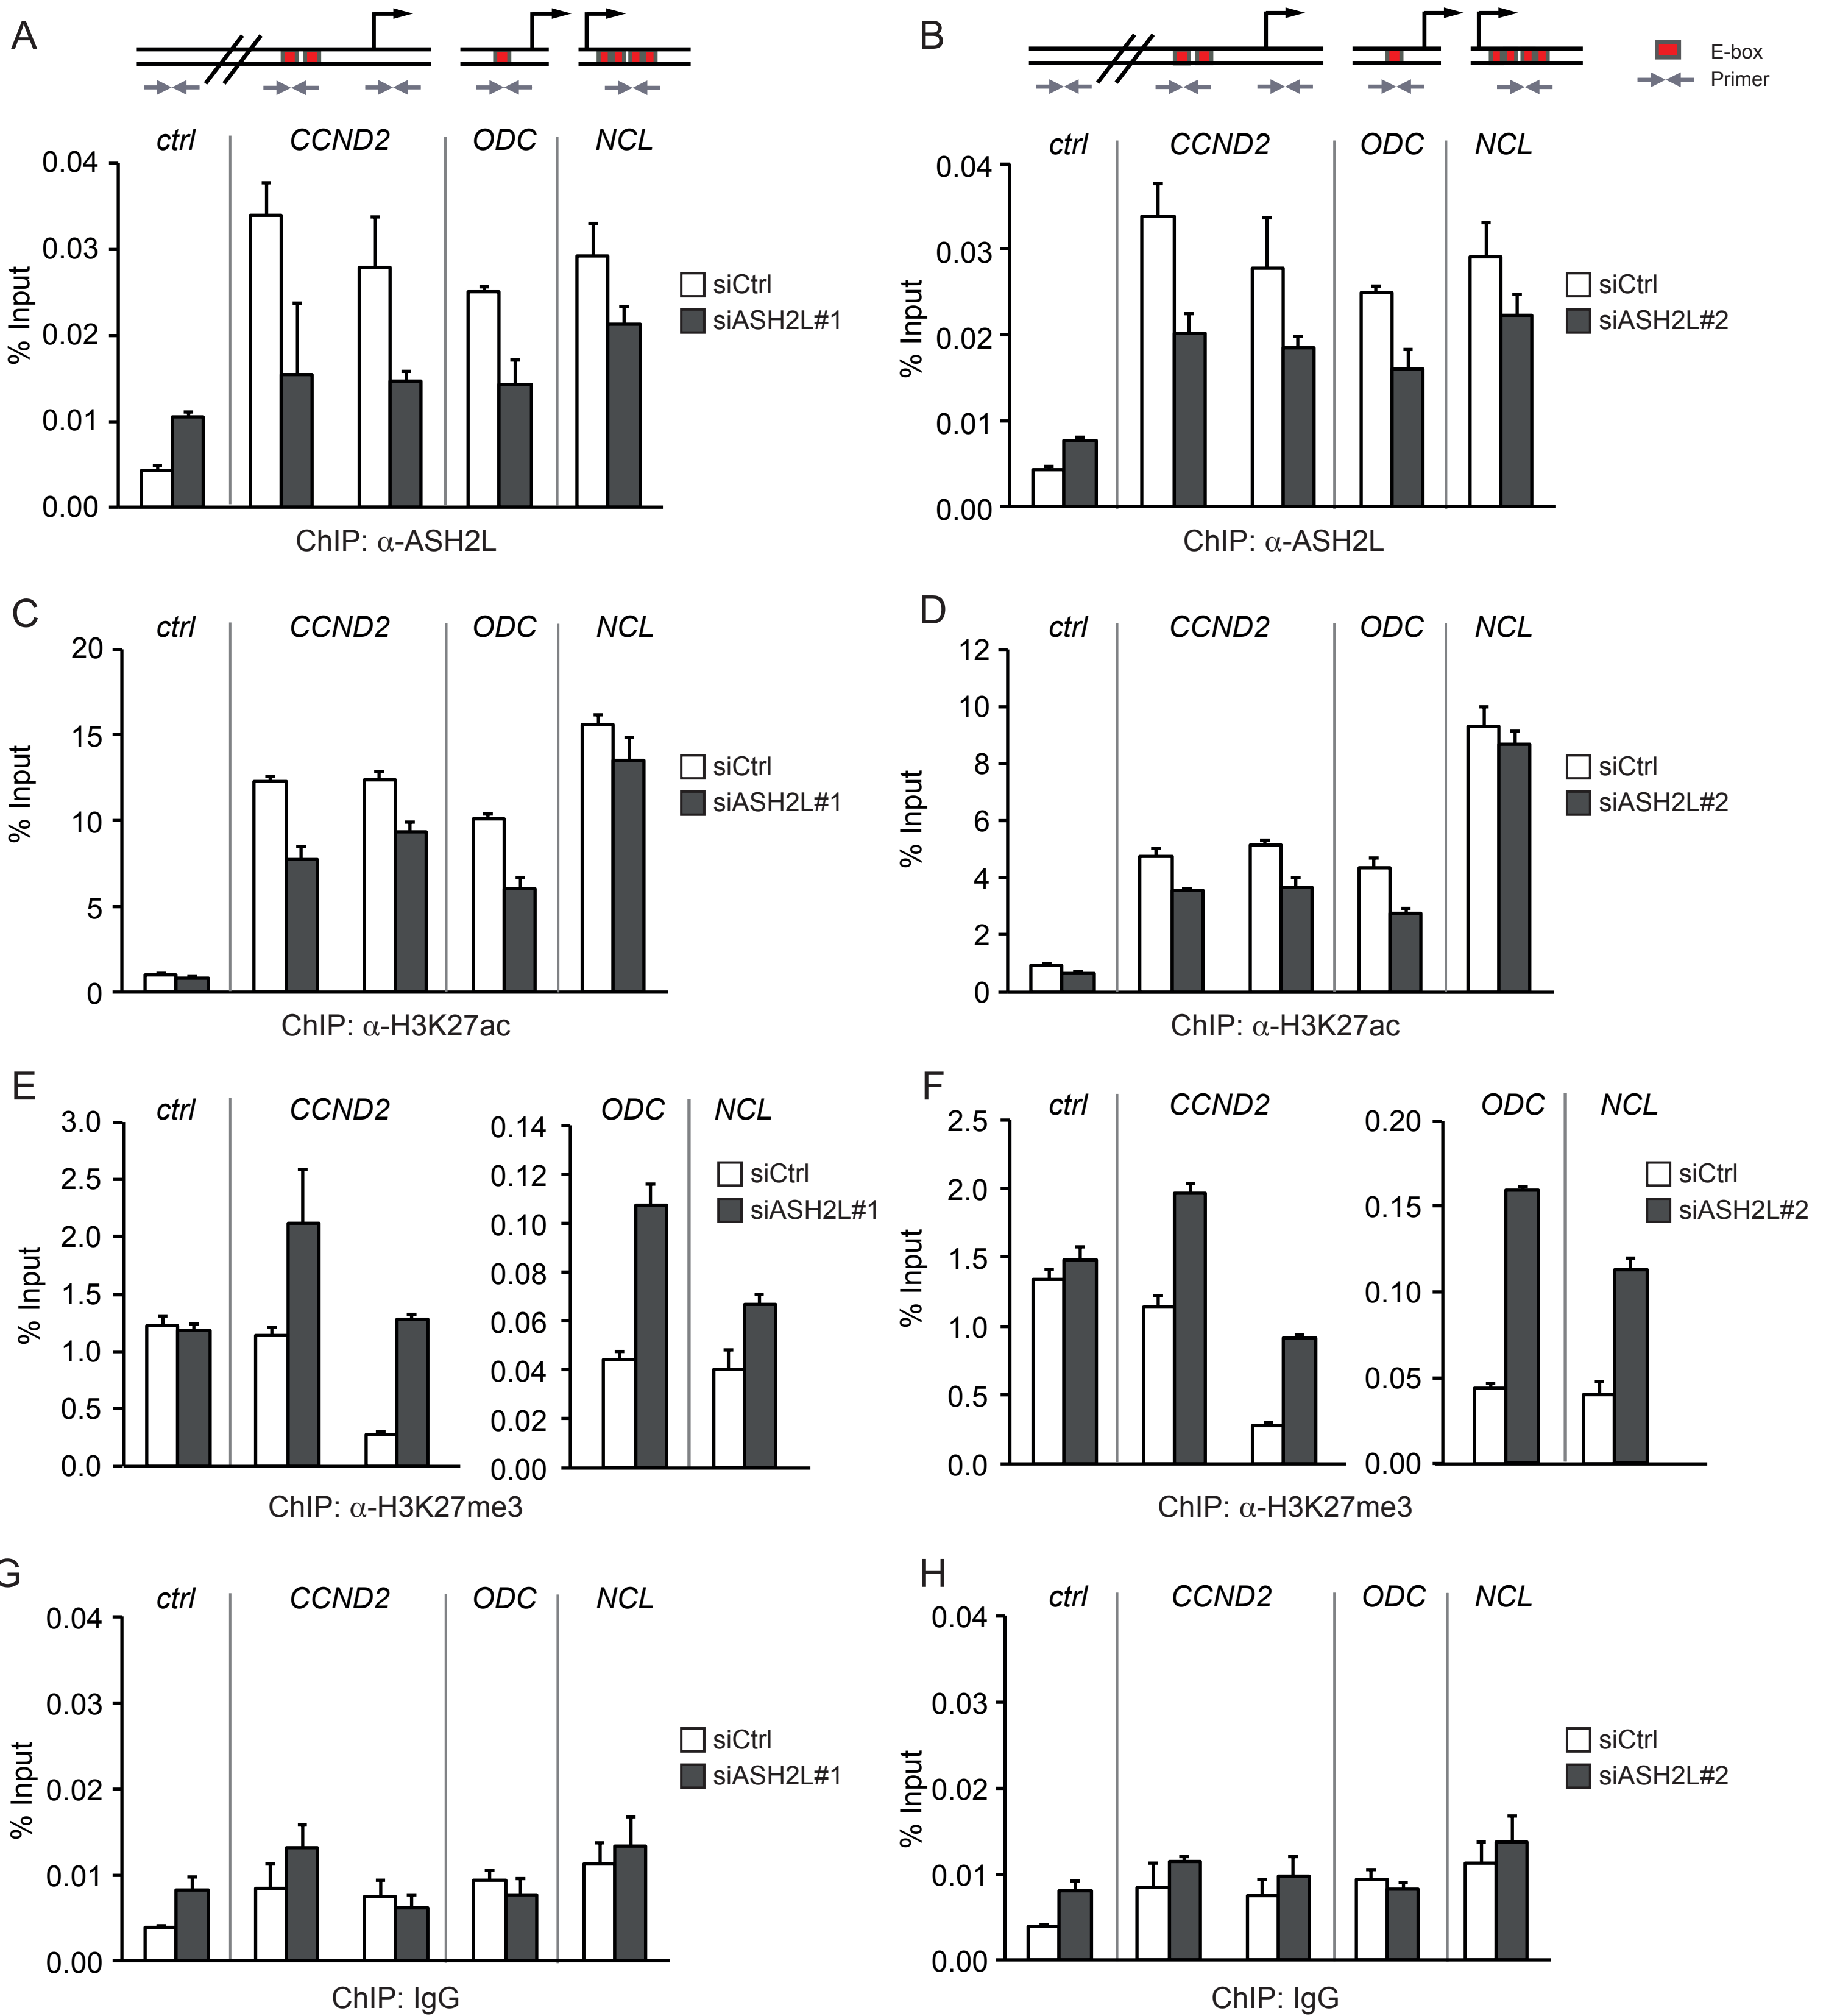

Figure S7 revised

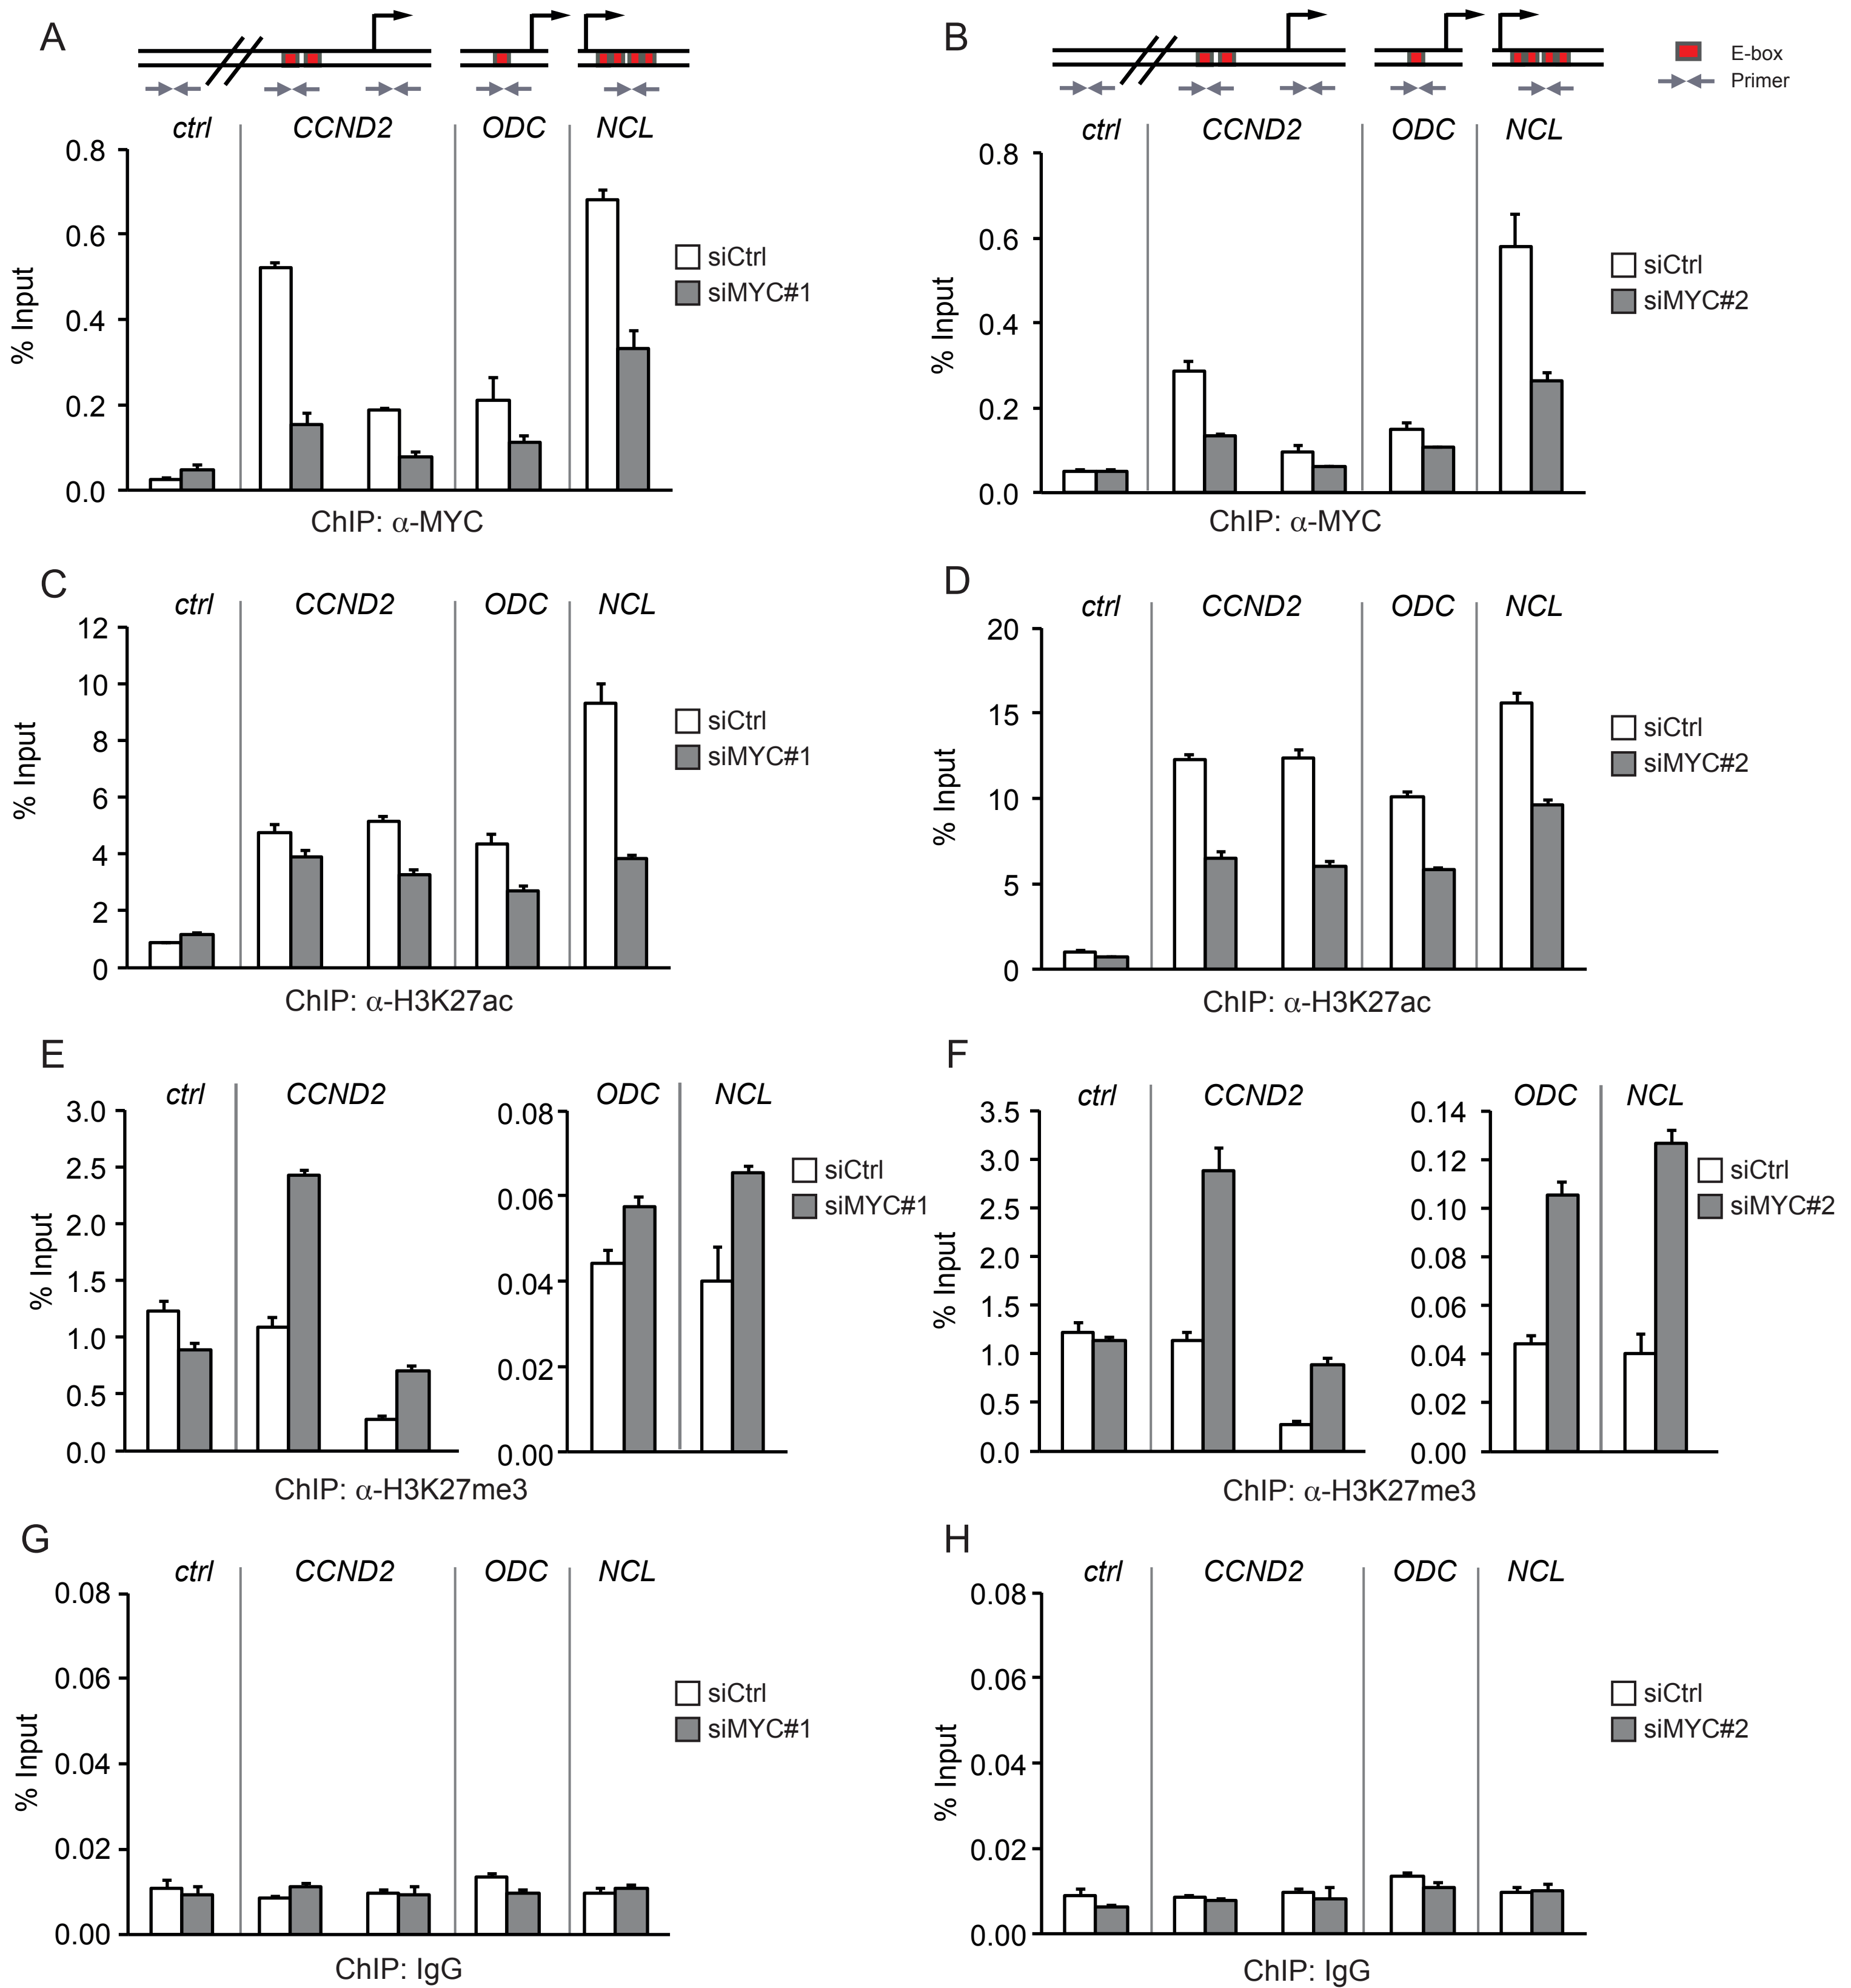

Supplement: supp_gku312_nar-02550-x-2013-File010.pdf [file supp_gku312_nar-02550-x-2013-File010.pdf]
